# Supplementary material for: Matrigel Tunes H9 Stem Cell-Derived Human Cerebral Organoid Development
Source: MDPI journal article supplement (doi:10.3390/organoids2040013), 2023-10-05
Supplement: s1 [file s1]

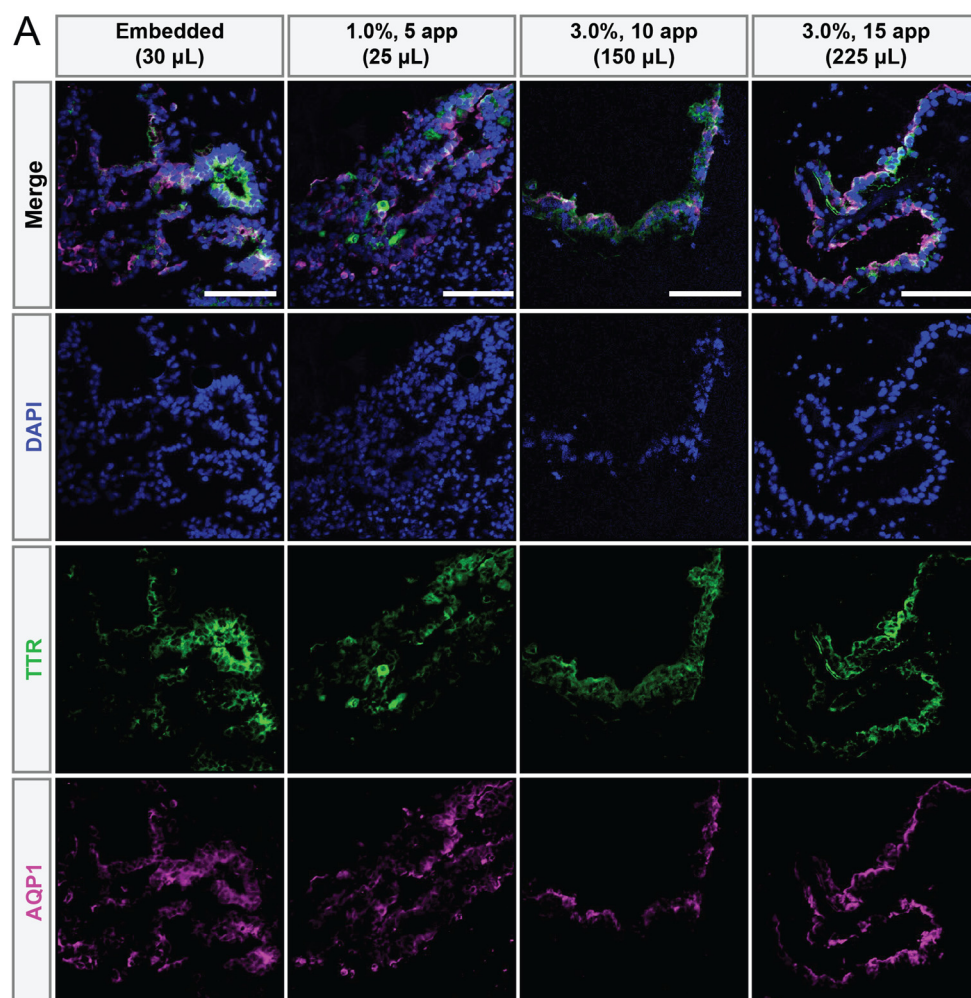

**Figure S1.** High Resolution Images Highlighting TTR+ Region Morphology. Scale bars = 100  $\mu$ m.
